# Supplementary material for: A novel diazoresin/polyethylene glycol covalent capillary coating for analysis of proteins by capillary electrophoresis
Source: Royal Society of Chemistry journal article supplement (doi:10.1039/c3ra23328f), 2013-01-01
Supplement: c3ra23328f.pdf [file c3ra23328f.pdf]

The EOF mobility vs pH graph (ESI,† Fig. S1) and the corresponding reproducibility data (ESI,† Table S1) of the DR/PVA coatings:

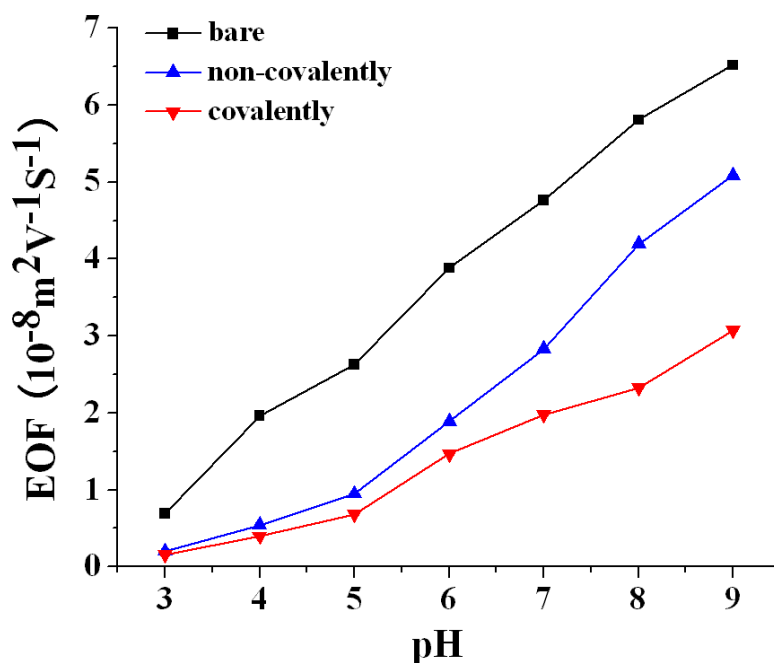

**Fig. S1.** Influence of pH on EOF of bare, DR/PVA non-covalently and covalently coated capillary columns. Test conditions: buffer, 40 mM phosphate; injection, 20 s with a height difference of 20 cm; applied voltage, +15 kV; UV detection, 214 nm; capillary, 75  $\mu\text{m}$  ID  $\times$  50 cm (41 cm effective); capillary temperature, 25  $^{\circ}\text{C}$ .

**Table S1.** Separation performance of the DR/PVA covalent capillary coatings

| protein | Migration time RSD (%) |                     |                                 |                                 |
|---------|------------------------|---------------------|---------------------------------|---------------------------------|
|         | run to run<br>(n=5)    | day to day<br>(n=7) | capillary to capillary<br>(n=5) | continuous 200<br>times running |
| Cyt-c   | 0.93                   | 1.95                | 2.83                            | 2.44                            |
| Lys     | 0.75                   | 1.89                | 2.97                            | 2.21                            |
| BSA     | 1.47                   | 2.49                | 3.65                            | 2.62                            |
| AMG     | 1.61                   | 2.72                | 3.87                            | 2.89                            |
| Mb      | 1.53                   | 2.55                | 3.75                            | 2.80                            |

Separation conditions: the same as Fig. 8.
